# Supplementary material for: 5’-flanking variants of equine casein genes (CSN1S1, CSN1S2, CSN2, CSN3) and their relationship with gene expression and milk composition
Source: PubMed Central journal article supplement (PMC6373402; doi:10.1007/s13353-018-0473-2), 2018-10-16
Supplement: 13353_2018_473_MOESM1_ESM.pdf [file 13353_2018_473_MOESM1_ESM.pdf]

Supplementary material 1. PCR Primer sequences and amplification details.

| Primers (probes)<br>Sequences                                                                                           | PCR<br>product<br>size (bp) | Annealing<br>temp. (°C) | No. of<br>cycles | Polymerase                            |
|-------------------------------------------------------------------------------------------------------------------------|-----------------------------|-------------------------|------------------|---------------------------------------|
| <b>Screening for polymorphisms and genotyping</b>                                                                       |                             |                         |                  |                                       |
| CSN1S1_IF: ATGGTGCCCAAAACAATTA<br>CSN1S1_IR: TTGAACCCAAGATTGGGAAG                                                       | 661                         | 60                      | 35               | DreamTaq (Thermo Scientific)          |
| CSN1S1_IIF: GAATGTTGTGGCTGGTTTGA<br>CSN1S1_IIR: TTTCCAACATCATTGGCTCA                                                    | 639                         | 62                      | 35               | Perpetual Taq (EurX)                  |
| CSN1S2_IF: GAGAGCCGAGTTTCCCATTA<br>CSN1S2_IR: TGAAAACATTACCCTGTTTCCT                                                    | 563                         | 60                      | 35               | DreamTaq (Thermo Scientific)          |
| CSN1S2_IIF: TGCACCTGAGCAGAATCCAG<br>CSN1S2_IIR: TTGCTTATAGTCTGCCAGCATT                                                  | 550                         | 60                      | 35               | DreamTaq (Thermo Scientific)          |
| CSN2_IF: AATGGCCCTGGGAACTAAG<br>CSN2_IR: TTTCCAAGGTGGAGGACAAG                                                           | 549                         | 60                      | 35               | DreamTaq (Thermo Scientific)          |
| CSN2_IIF: CAACACCAATACCCCAGTCC<br>CSN2_IIR: CCGCATTTTCATGCTAACCT                                                        | 686                         | 60                      | 35               | Taq (EurX)                            |
| CSN3_IF: ATGGCCCCTTTCTTTATGCT<br>CSN3_IR: TTTGCAGGTCAGGTCTTGCT                                                          | 616                         | 60                      | 35               | Taq (EurX)                            |
| CSN3_IIF: GCTTTCTAGGGTTCTGAACATTG<br>CSN3_IIR: CTTCTTCCAGAATCGCAAC                                                      | 654                         | 60                      | 35               | Taq (EurX)                            |
| <b>Gene expression studies</b>                                                                                          |                             |                         |                  |                                       |
| ACTBF: TCCTTCCTGGGGCATGGAATC<br>ACTBR: TCCTGTCGGCGATGCCT<br>ACTBprobe: CCGTAAGGACCTGTACGCCAACACAGT                      | 145                         | 60                      | 45               |                                       |
| GAPDHF: GAGGACCAGGTTGTCTCCTGC<br>GAPDHR: ATGAGCTTGACAAAGTGGTCGTT<br>GAPDHprobe: ACCCACTCTCCACCTTCGATGCT                 | 101                         | 60                      | 45               |                                       |
| TOP2BF: GCCAGCTGACAATAAACAGAGG<br>TOP2BR: TGCCTTTCCCATTTCCAA<br>TOP2Bprobe: TTGATCCTGAATCTAACATTATAAGCA                 | 101                         | 60                      | 45               |                                       |
| KRT8F: ACCCAGGAGAAGGAGCAGAT<br>KRT8R: GCTCCACTTGGTCTCCAGAA<br>KRT8probe: GCATCTGGAACAGCAGAACA                           | 108                         | 60                      | 45               |                                       |
| CSN1S1F: AGACTGAGCAAATACAACCAACTCC<br>CSN1S1R: CTCATAGGCTTTCTCTGGCTGTTT<br>CSN1S1probe: CCATGCCCAGGAACAACCTTATCAGAATGAA | 95                          | 60                      | 45               | LightCycler 480 Probes Master (Roche) |
| CSN1S2F: CACCACCTAAAACAACCTGAACAAAAT<br>CSN1S2R: AGTCCCCTGTCTTAGTCTGATCCC<br>CSN1S2probe: CAACCTCGGATTGTCCTGACCCC       | 127                         | 60                      | 45               |                                       |
| CSN2F: CAGCAAAGAGAGGTTGAACGC<br>CSN2R: CAGGATGCTTTGTGGAACGAC<br>CSN2probe: TGTCCAGCCACAGCCTGTAGTCTATCCT                 | 114                         | 60                      | 45               |                                       |
| CSN3F: AATATCTACCCATCCACTGTGGTACG<br>CSN3R: GTTTCAGCAAGACCTTTGTTGTC<br>CSN3probe: ACCAACAGTGAACAATGCAGTCATTCCAGA        | 296                         | 60                      | 45               |                                       |
