# Supplementary material for: 5’-flanking variants of equine casein genes (CSN1S1, CSN1S2, CSN2, CSN3) and their relationship with gene expression and milk composition
Source: PubMed Central journal article supplement (PMC6373402; doi:10.1007/s13353-018-0473-2), 2018-10-16
Supplement: 13353_2018_473_MOESM2_ESM.pdf [file 13353_2018_473_MOESM2_ESM.pdf]

Supplementary material 2. Impact of detected polymorphic sites on consensus sequences for transcription factors

| <b>Polymorphism</b> | <b>Predicted TF binding sites*</b>                            |                                                         |
|---------------------|---------------------------------------------------------------|---------------------------------------------------------|
| <b>CSN1S1</b>       |                                                               |                                                         |
| c.-1665C>T          | <b>Allele C</b><br>-                                          | <b>Allele T</b><br>FOS, JUN, JDP2                       |
| c.-1732A>G          | <b>Allele A</b><br>RHOXF1                                     | <b>Allele G</b><br>RHOXF1, ETS1, NFATC1, NFATC2, NFATC3 |
| c.-1917G>T          | <b>Allele G</b><br>NFIC, GATA1, GATA2                         | <b>Allele T</b><br>NFIC, PRRX2, DLX3, DLX4, DLX2        |
| c.-1922C>G          | <b>Allele C</b><br>GATA2, RHOXF1, NFIC, NFIX, NFYB            | <b>Allele G</b><br>GATA2, CEBPB, JUN, CEBPA, FOS::JUN   |
| c.-2168G>C          | <b>Allele G</b><br>GATA1, GATA2, MZF1, NFKB1                  | <b>Allele C</b><br>GATA1, GATA2, HIC2                   |
| <b>CSN1S2</b>       |                                                               |                                                         |
| c.-2047_2048insAT   | <b>Allele + (ins)</b><br>NOTO, Nkx2-5, Arid3a, Barhl1, NKX6-2 | <b>Allele - (del)</b><br>NOTO, Nkx2-5, Pdx1             |
| c.-2543G>A          | <b>Allele G</b><br>NR4A2, Mafb                                | <b>Allele A</b><br>NR4A2, SOX10                         |
| <b>CSN2</b>         |                                                               |                                                         |
| c.-2105C>G          | <b>Allele C</b><br>RUNX3, RUNX1, RUNX2, ZNF354C, LIN54        | <b>Allele G</b><br>MEIS1                                |
| c.-2429C>T          | <b>Allele C</b><br>-                                          | <b>Allele T</b><br>Rxra, NR4A2                          |
| c.-2817T>C          | <b>Allele T</b><br>FOXC1, MEIS1                               | <b>Allele C</b><br>FOXC1                                |
| c.-2973C>G          | <b>Allele C</b><br>Bhlha15, HLTF, FOXL1                       | <b>Allele G</b><br>Bhlha15, HLTF, FOXL1, MEIS1          |
| <b>CSN3</b>         |                                                               |                                                         |
| c.-2925C>G          | <b>Allele C</b><br>MZF1, ETS1                                 | <b>Allele G</b><br>-                                    |
| c.-2970C>T          | <b>Allele C</b><br>Ahr::Arnt                                  | <b>Allele T</b><br>TBX21, MGA, TBX1, TBR1, EOMES        |
| c.-3012G>C          | <b>Allele G</b><br>GATA2, GATA3, FOXL1, HOXA5                 | <b>Allele C</b><br>GATA2, GATA3, FOXL1                  |
| c.-3515G>A          | <b>Allele G</b><br>RHOXF1                                     | <b>Allele A</b><br>-                                    |
| c.-3669G>C          | <b>Allele G</b><br>-                                          | <b>Allele C</b><br>BARHL2                               |
| c.-3711T>C          | <b>Allele T</b><br>FOXC1, SPIB, ETS1, ARID3A,                 | <b>Allele C</b><br>FOXC1, NR2E1                         |

TF – transcription factors, \*only 1-5 consensus sites with the highest relative scores are shown (according to JASPAR database)
