# Supplementary material for: 5’-flanking variants of equine casein genes (CSN1S1, CSN1S2, CSN2, CSN3) and their relationship with gene expression and milk composition
Source: PubMed Central journal article supplement (PMC6373402; doi:10.1007/s13353-018-0473-2), 2018-10-16
Supplement: 13353_2018_473_MOESM3_ESM.pdf [file 13353_2018_473_MOESM3_ESM.pdf]

Supplementary material 3. Association of selected equine casein 5'-flanking variants, gene expression and basic milk composition.

**Table 1. Alpha-s1 casein (CSN1S1).**

| SNP        | Genotype | CSN1S1            |                    |                    |                                  |                  |                | Basic milk components |                |                |               |     |                |                   |     |                |                |
|------------|----------|-------------------|--------------------|--------------------|----------------------------------|------------------|----------------|-----------------------|----------------|----------------|---------------|-----|----------------|-------------------|-----|----------------|----------------|
|            |          | mRNA (RA)         |                    |                    | Milk protein concentration (g/L) |                  |                | Protein (g/100mL)     |                |                | Fat (g/100mL) |     |                | Lactose (g/100mL) |     |                |                |
|            |          | PCH               | PWH                | PPH                | PCH                              | PWH              | PPH            | PCH                   | PWH            | PPH            | PCH           | PWH | PPH            | PCH               | PWH | PPH            |                |
| c.-1918T>A | AA       | n/a               | n/a                | 521.68<br>(144.98) | n/a                              | n/a              | 3.37<br>(0.33) | n/a                   | n/a            | 1.59<br>(0.07) | n/a           | n/a | 1.97<br>(0.23) | n/a               | n/a | 6.56<br>(0.08) |                |
|            | TA       |                   |                    | 462.37<br>(83.70)  |                                  |                  | 3.28<br>(0.19) |                       |                | 1.70<br>(0.04) |               |     | 1.86<br>(0.13) |                   |     | 6.46<br>(0.04) |                |
|            | TT       |                   |                    | 472.91<br>(60.05)  |                                  |                  | 3.62<br>(0.13) |                       |                | 1.73<br>(0.02) |               |     | 1.70<br>(0.09) |                   |     | 6.42<br>(0.03) |                |
| c.-1665C>T | CC       | n/a               | 639.12<br>(56.89)  | n/a                | n/a                              | 3.76<br>(0.11)   | n/a            | n/a                   | 1.79<br>(0.02) | n/a            | n/a           | n/a | n/a            | n/a               | n/a | n/a            |                |
|            | TC       |                   | 481.30<br>(95.35)  |                    |                                  | 3.66<br>(0.19)   |                |                       | 1.80<br>(0.03) |                |               |     |                |                   |     |                | 1.43<br>(0.11) |
| c.-2168G>C | CG       |                   | 648.43<br>(104.14) |                    |                                  | 3.9225<br>(0.21) |                |                       | 1.77<br>(0.03) |                |               |     |                |                   |     |                | 1.37<br>(0.06) |
|            | GG       | 582.94<br>(56.12) | 3.68<br>(0.11)     | 1.80<br>(0.02)     |                                  |                  |                |                       |                |                |               |     |                |                   |     |                |                |

n/a – not analyzed due to low frequency of given polymorphism

**Table 2. Alpha-s2 casein (CSN1S2). Values marked with different lowercase letters differed significantly (p<0.05).**

| SNP                | Genotype | CSN1S2    |                   |                    |                                  |                |                | Basic milk components |                |                             |               |                 |                |                   |                |                |
|--------------------|----------|-----------|-------------------|--------------------|----------------------------------|----------------|----------------|-----------------------|----------------|-----------------------------|---------------|-----------------|----------------|-------------------|----------------|----------------|
|                    |          | mRNA (RA) |                   |                    | Milk protein concentration (g/L) |                |                | Protein (g/100mL)     |                |                             | Fat (g/100mL) |                 |                | Lactose (g/100mL) |                |                |
|                    |          | PCH       | PWH               | PPH                | PCH                              | PWH            | PPH            | PCH                   | PWH            | PPH                         | PCH           | PWH             | PPH            | PCH               | PWH            | PPH            |
| c.-2047_-2048insAT | ins/ins  | n/a       | 133.69<br>(29.84) | 206.63<br>(169.77) | n/a                              | 0.53<br>(0.05) | 0.40<br>(0.22) | n/a                   | 1.80<br>(0.02) | 1.83 <sup>a</sup><br>(0.09) | n/a           | 1.62<br>(0.22)  | 1.58<br>(0.33) | n/a               | 6.45<br>(0.04) | 6.38<br>(0.12) |
|                    | ins/del  |           | 173.70<br>(31.17) | 249.01<br>(75.92)  |                                  | 0.55<br>(0.05) | 0.62<br>(0.09) |                       | 1.81<br>(0.02) | 1.83 <sup>a</sup><br>(0.04) |               | 1.66<br>(0.16)  | 1.82<br>(0.15) |                   | 6.50<br>(0.04) | 6.42<br>(0.05) |
|                    | del/del  |           | 232.66<br>(54.05) | 237.11<br>(45.94)  |                                  | 0.56<br>(0.08) | 0.54<br>(0.05) |                       | 1.72<br>(0.04) | 1.66 <sup>b</sup><br>(0.02) |               | 1.577<br>(0.07) | 1.78<br>(0.09) |                   | 6.45<br>(0.07) | 6.46<br>(0.03) |
| c.-2121T>C         | CC       | n/a       | 211.75<br>(54.69) | n/a                | n/a                              | 0.67<br>(0.08) | n/a            | n/a                   | 1.80<br>(0.04) | n/a                         | n/a           | 1.41<br>(0.14)  | n/a            | n/a               | 6.52<br>(0.07) | n/a            |
|                    | TC       |           | 159.57<br>(27.95) |                    |                                  | 0.52<br>(0.04) |                |                       | 1.79<br>(0.02) |                             |               | 1.34<br>(0.07)  |                |                   | 6.49<br>(0.03) |                |
|                    | TT       |           | 150.84<br>(34.87) |                    |                                  | 0.53<br>(0.05) |                |                       | 1.80<br>(0.02) |                             |               | 1.42<br>(0.09)  |                |                   | 6.43<br>(0.04) |                |

n/a – not analyzed due to low frequency of given polymorphism

**Table 3. Beta casein (CSN2). Values marked with different lowercase letters differed significantly (p<0.05).**

| SNP        | Genotype | CSN2                                   |                   |                     |                                  |                |                                   | Basic milk components |                |                 |                |                |                |                                   |                |                |                |
|------------|----------|----------------------------------------|-------------------|---------------------|----------------------------------|----------------|-----------------------------------|-----------------------|----------------|-----------------|----------------|----------------|----------------|-----------------------------------|----------------|----------------|----------------|
|            |          | mRNA (RA)                              |                   |                     | Milk protein concentration (g/L) |                |                                   | Protein (g/100mL)     |                |                 | Fat (g/100mL)  |                |                | Lactose (g/100mL)                 |                |                |                |
|            |          | PCH                                    | PWH               | PPH                 | PCH                              | PWH            | PPH                               | PCH                   | PWH            | PPH             | PCH            | PWH            | PPH            | PCH                               | PWH            | PPH            |                |
| c.-2105C>G | CC       | <b>1468.14<sup>a</sup></b><br>(129.66) | 733.46<br>(81.47) | 1079.25<br>(133.51) | 1.54<br>(0.11)                   | 1.43<br>(0.08) | 1.67<br>(0.09)                    | 1.65<br>(0.03)        | 1.80<br>(0.02) | 1.72<br>(0.02)  | 1.52<br>(0.08) | 1.41<br>(0.05) | 1.84<br>(0.09) | <b>6.51<sup>a</sup></b><br>(0.02) | 6.48<br>(0.02) | 6.45<br>(0.03) |                |
|            | GC       | <b>2103.93<sup>b</sup></b><br>(281.78) | 779.83<br>(79.41) | 920.46<br>(210.06)  | 1.45<br>(0.11)                   | 1.37<br>(0.18) | 1.41<br>(0.15)                    | 1.65<br>(0.03)        | 1.77<br>(0.03) | 1.68<br>(0.041) | 1.65<br>(0.08) | 1.22<br>(0.12) | 1.66<br>(0.13) | <b>6.41<sup>b</sup></b><br>(0.02) | 6.45<br>(0.06) | 6.43<br>(0.04) |                |
| c.-2429C>T | CC       | 773.73<br>(70.23)                      | n/a               | n/a                 | 1.58<br>(0.09)                   | n/a            | n/a                               | n/a                   | n/a            | n/a             | 1.61<br>(0.07) | n/a            | n/a            | 6.48<br>(0.02)                    | n/a            | n/a            |                |
|            | CT       | 754.90<br>(103.58)                     |                   |                     | 1.37<br>(0.14)                   |                |                                   |                       |                |                 | 1.62<br>(0.04) |                |                | 1.57<br>(0.11)                    |                |                | 6.46<br>(0.03) |
|            | TT       | 500.46<br>(286.63)                     |                   |                     | 1.03<br>(0.40)                   |                |                                   |                       |                |                 | 1.47<br>(0.12) |                |                | 1.47<br>(0.31)                    |                |                | 6.25<br>(0.10) |
| c.-2973C>G | CC       | 659.14<br>(91.28)                      | n/a               | 931.90<br>(128.12)  | 1.47<br>(0.13)                   | n/a            | <b>1.50<sup>a</sup></b><br>(0.09) | 1.64<br>(0.04)        | n/a            | 1.70<br>(0.02)  | n/a            | n/a            | 1.77<br>(0.08) | n/a                               | n/a            | n/a            |                |
|            | CG       | 847.49<br>(83.08)                      |                   | 1331.52<br>(219.35) | 1.51<br>(0.12)                   |                | <b>1.82<sup>b</sup></b><br>(0.16) | 1.65<br>(0.03)        |                | 1.75<br>(0.04)  |                |                | 1.83<br>(0.15) |                                   |                |                |                |
|            | GG       | 731.52<br>(142.31)                     |                   | n/a                 | 1.54<br>(0.21)                   |                | n/a                               | 1.65<br>(0.06)        |                | n/a             |                |                | n/a            |                                   |                |                |                |

n/a – not analyzed due to low frequency of given polymorphism

**Table 4. Kappa-casein (CSN3). Values marked with different lowercase letters differed significantly ( $p < 0.05$ ).**

| SNP        | Genotype | CSN3                |                  |                  |                                  |                |                                          | Basic milk components |                |                                          |                |                |                |                   |                |                |
|------------|----------|---------------------|------------------|------------------|----------------------------------|----------------|------------------------------------------|-----------------------|----------------|------------------------------------------|----------------|----------------|----------------|-------------------|----------------|----------------|
|            |          | mRNA (RA)           |                  |                  | Milk protein concentration (g/L) |                |                                          | Protein (g/100mL)     |                |                                          | Fat (g/100mL)  |                |                | Lactose (g/100mL) |                |                |
|            |          | PCH                 | PWH              | PPH              | PCH                              | PWH            | PPH                                      | PCH                   | PWH            | PPH                                      | PCH            | PWH            | PPH            | PCH               | PWH            | PPH            |
| c.-3711T>C | CC       | 12.19<br>(5.08)     | n/a              | 27.81<br>(15.21) | 0.51<br>(0.05)                   | n/a            | <b>0.55<sup>a</sup></b><br><b>(0.09)</b> | 1.54<br>(0.06)        | n/a            | <b>1.59<sup>a</sup></b><br><b>(0.06)</b> | 1.47<br>(0.16) | n/a            | 1.97<br>(0.24) | 6.50<br>(0.05)    | n/a            | 6.56<br>(0.08) |
|            | TC       | 15.54<br>(2.70)     |                  | 43.69<br>(8.78)  | 0.56<br>(0.02)                   |                | <b>0.65<sup>a</sup></b><br><b>(0.05)</b> | 1.67<br>(0.03)        |                | <b>1.63<sup>a</sup></b><br><b>(0.03)</b> | 1.63<br>(0.08) |                | 1.73<br>(0.13) | 6.46<br>(0.03)    |                | 6.44<br>(0.05) |
|            | TT       | 22.39<br>(3.30)     |                  | 39.01<br>(6.30)  | 0.57<br>(0.03)                   |                | <b>0.79<sup>b</sup></b><br><b>(0.03)</b> | 1.66<br>(0.04)        |                | <b>1.77<sup>b</sup></b><br><b>(0.02)</b> | 1.57<br>(0.10) |                | 1.78<br>(0.09) | 6.46<br>(0.03)    |                | 6.43<br>(0.03) |
| c.-3669G>C | CC       | 12.23<br>(4.54)     | n/a              | 27.81<br>(15.21) | 0.49<br>(0.04)                   | n/a            | <b>0.55<sup>a</sup></b><br><b>(0.09)</b> | 1.58<br>(0.05)        | n/a            | <b>1.59<sup>a</sup></b><br><b>(0.06)</b> | 1.44<br>(0.14) | n/a            | 1.97<br>(0.24) | 6.49<br>(0.04)    | n/a            | 6.56<br>(0.08) |
|            | GC       | 16.49<br>(2.95)     |                  | 43.69<br>(8.78)  | 0.56<br>(0.02)                   |                | <b>0.65<sup>a</sup></b><br><b>(0.05)</b> | 1.66<br>(0.03)        |                | <b>1.63<sup>a</sup></b><br><b>(0.03)</b> | 1.66<br>(0.09) |                | 1.73<br>(0.13) | 6.45<br>(0.03)    |                | 6.43<br>(0.04) |
|            | GG       | 21.74<br>(3.15)     |                  | 39.01<br>(6.30)  | 0.58<br>(0.03)                   |                | <b>0.79<sup>b</sup></b><br><b>(0.03)</b> | 1.67<br>(0.04)        |                | <b>1.77<sup>b</sup></b><br><b>(0.02)</b> | 1.58<br>(0.09) |                | 1.78<br>(0.09) | 6.47<br>(0.03)    |                | 6.43<br>(0.03) |
| c.-3515G>A | GA       | n/a                 | 32.64<br>(20.90) | 36.32<br>(8.10)  | n/a                              | 0.68<br>(0.07) | 0.80<br>(0.05)                           | n/a                   | 1.86<br>(0.04) | 1.76<br>(0.04)                           | n/a            | 1.17<br>(0.13) | 1.60<br>(0.12) | n/a               | 6.53<br>(0.07) | 6.43<br>(0.05) |
|            | GG       |                     | 51.01<br>(9.62)  | 40.95<br>(6.02)  |                                  | 0.67<br>(0.03) | 0.68<br>(0.03)                           |                       | 1.78<br>(0.02) | 1.68<br>(0.03)                           |                | 1.42<br>(0.06) | 1.89<br>(0.09) |                   | 6.47<br>(0.03) | 6.46<br>(0.03) |
| c.-2756A>G | AA       | 22.3948<br>(3.3067) | n/a              | 43.55<br>(6.27)  | 0.57<br>(0.03)                   | n/a            | 0.76<br>(0.03)                           | 1.66<br>(0.04)        | n/a            | 1.75<br>(0.03)                           | 1.58<br>(0.11) | n/a            | 1.75<br>(0.09) | 6.46<br>(0.04)    | n/a            | 6.42<br>(0.03) |
|            | AG       | 15.5465<br>(2.7013) |                  | 34.87<br>(8.74)  | 0.56<br>(0.02)                   |                | 0.72<br>(0.05)                           | 1.67<br>(0.03)        |                | 1.68<br>(0.04)                           | 1.64<br>(0.09) |                | 1.79<br>(0.14) | 6.46<br>(0.03)    |                | 6.47<br>(0.05) |
|            | GG       | 12.1984<br>(5.0874) |                  | 27.81<br>(15.14) | 0.515<br>(0.05)                  |                | 0.55<br>(0.09)                           | 1.55<br>(0.06)        |                | 1.59<br>(0.07)                           | 1.47<br>(0.16) |                | 1.97<br>(0.24) | 6.50<br>(0.06)    |                | 6.56<br>(0.08) |

**Table 4 (continuation). Kappa-casein (CSN3). Values marked with different lowercase letters differed significantly ( $p < 0.05$ ).**

| SNP        | Genotype | CSN3            |     |                  |                                  |     |                                           | Basic milk components |     |                 |                |     |                |                   |     |                |
|------------|----------|-----------------|-----|------------------|----------------------------------|-----|-------------------------------------------|-----------------------|-----|-----------------|----------------|-----|----------------|-------------------|-----|----------------|
|            |          | mRNA (RA)       |     |                  | Milk protein concentration (g/L) |     |                                           | Protein (g/100mL)     |     |                 | Fat (g/100mL)  |     |                | Lactose (g/100mL) |     |                |
|            |          | PCH             | PWH | PPH              | PCH                              | PWH | PPH                                       | PCH                   | PWH | PPH             | PCH            | PWH | PPH            | PCH               | PWH | PPH            |
| c.-2925C>G | CC       | 22.39<br>(3.30) | n/a | 38.92<br>(6.29)  | 0.58<br>(0.03)                   | n/a | <b>0.79<sup>a</sup></b><br><b>(0.04)</b>  | 1.67<br>(0.04)        | n/a | 1.74<br>(0.03)  | 1.58<br>(0.11) | n/a | 1.72<br>(0.09) | 6.46<br>(0.04)    | n/a | 6.42<br>(0.03) |
|            | CG       | 15.55<br>(2.70) |     | 43.88<br>(8.78)  | 0.56<br>(0.03)                   |     | <b>0.67<sup>ab</sup></b><br><b>(0.05)</b> | 1.67<br>(0.03)        |     | 1.70<br>(0.041) | 1.64<br>(0.09) |     | 1.86<br>(0.14) | 6.46<br>(0.03)    |     | 6.47<br>(0.05) |
|            | GG       | 12.19<br>(5.09) |     | 27.81<br>(15.21) | 0.52<br>(0.05)                   |     | <b>0.55<sup>b</sup></b><br><b>(0.09)</b>  | 1.55<br>(0.06)        |     | 1.59<br>(0.07)  | 1.47<br>(0.16) |     | 1.97<br>(0.24) | 6.50<br>(0.05)    |     | 6.56<br>(0.08) |
| c.-3012G>C | CC       | 12.42<br>(4.56) | n/a | 27.81<br>(15.22) | 0.55<br>(0.04)                   | n/a | 0.55<br>(0.09)                            | 1.59<br>(0.06)        | n/a | 1.59<br>(0.07)  | 1.51<br>(0.14) | n/a | 1.97<br>(0.24) | 6.51<br>(0.05)    | n/a | 6.56<br>(0.08) |
|            | GC       | 18.56<br>(2.54) |     | 42.29<br>(8.14)  | 0.54<br>(0.02)                   |     | 0.69<br>(0.05)                            | 1.67<br>(0.03)        |     | 1.69<br>(0.04)  | 1.69<br>(0.08) |     | 1.86<br>(0.13) | 6.45<br>(0.03)    |     | 6.47<br>(0.04) |
|            | GG       | 19.22<br>(4.14) |     | 39.49<br>(6.59)  | 0.62<br>(0.04)                   |     | 0.78<br>(0.04)                            | 1.66<br>(0.05)        |     | 1.75<br>(0.03)  | 1.39<br>(0.13) |     | 1.69<br>(0.11) | 6.48<br>(0.04)    |     | 6.42<br>(0.03) |

n/a – not analyzed due to low frequency of given polymorphism
